## CORRESPONDENCE

Anesthesiology

1998; 88:1131

© 1998 American Society of Anesthesiologists, Inc.

Lippincott-Raven Publishers

## Rectal Acetaminophen Pharmacokinetics

*To the Editor:*—We read with interest the recent study by Birmingham *et al.*<sup>1</sup> concerning the pharmacokinetics of rectal acetaminophen in children. The estimate for clearance (CL/F) of  $5.46 \text{ ml} \cdot \text{kg}^{-1} \cdot \text{min}^{-1}$  is similar to that previously reported in children after rectal administration.<sup>2</sup> However, the volume of distribution (Vd/F) estimate of 385 ml/kg seems to be low. The relative bioavailability (F) of rectal compared with oral acetaminophen formulations has been reported as 0.52 (range, 0.24–0.98)<sup>3</sup> and even as low as 0.3.<sup>6</sup> Estimates<sup>3,4</sup> of acetaminophen's Vd/F in children are within the range of 700–1,000 ml/kg after oral administration. We would therefore expect Birmingham *et al.*<sup>1</sup> to have found a Vd/F of at least 1,400–2,000 ml/kg, which is similar to the value of 1,903 ml/kg previously reported after rectal administration.<sup>2</sup> Figure 1 shows the "average" profile observed by Birmingham *et al.*<sup>1</sup> (20 mg/kg), and predictions made using their dissolution time model with a Vd/F of 385 ml/kg compared with a Vd/F of 1,400 or 2,000 ml/kg assuming rapid dissolution. The "average" concentrations illustrated<sup>1</sup> after 20 mg/kg peak around  $5\text{--}6 \mu\text{g/ml}$ , not  $8\text{--}10 \mu\text{g/ml}$  predicted by Birmingham *et al.*'s<sup>1</sup> model. However, when Vd/F in the range of 1,400–2,000 ml/kg is used, the model approximates more closely the reported "average" concentrations. It is clear that Birmingham *et al.*'s<sup>1</sup> model does not match their own observed values.

Finally, we agree that suppository size may affect absorption characteristics. However, there is no consistent pattern in the dissolution times reported by Birmingham *et al.*<sup>1</sup> The rate at which suppositories dissolve does not seem to be a simple func-

tion of suppository dose size. Dissolution times decrease within the smaller suppository size group and within the larger size group, yet dissolution times increase from the small to the large suppository size group. The authors admit they have less confidence in this component of their model, and although it may improve the goodness of fit, it is not revealing about any mechanism of suppository dissolution and may have distorted their estimate of Vd/F.

**B. J. Anderson, F.A.N.Z.C.A.**

Department of Anaesthesia  
Auckland Children's Hospital  
Park Road  
Grafton

Auckland, New Zealand

**N. H. G. Holford, F.R.A.C.P.**

Associate Professor

Department of Pharmacology and Clinical Pharmacology  
Auckland University School of Medicine  
Park Road  
Grafton  
Auckland, New Zealand

## References

1. Birmingham PK, Tobin MJ, Henthorn TK, Fisher DM, Berkelhamer MC, Smith FA, Fanta KB, Cote CJ: Twenty-four-hour pharmacokinetics of rectal acetaminophen in children. An old drug with new recommendations. *ANESTHESIOLOGY* 1997; 87:244–52
2. Anderson BJ, Woolard GA, Holford NHG: Pharmacokinetics of rectal paracetamol after major surgery in children. *Paediatr Anaesth* 1995; 5:237–42
3. Brown RD, Wilson JT, Kearns GL, Eichler VF, Johnson VA, Bertrand KM: Single-dose pharmacokinetics of ibuprofen and acetaminophen in febrile children. *J Clin Pharmacol* 1992; 32:231–41
4. Prescott LF: Paracetamol (acetaminophen), A Critical Bibliographic Review, First Edition. London, Taylor and Francis Publishers, 1996
5. Montgomery CJ, McCormack JP, Reichert CC, Marsland CP: Plasma concentrations after high-dose (45 mg/kg) rectal acetaminophen in children. *Can J Anaesth* 1995; 42:982–6
6. Dange SV, Shah KU, Deshpande AS, Shrotri DS: Bioavailability of acetaminophen after rectal administration. *Indian Pediatr* 1987; 24:331–2

(Accepted for publication December 17, 1997.)

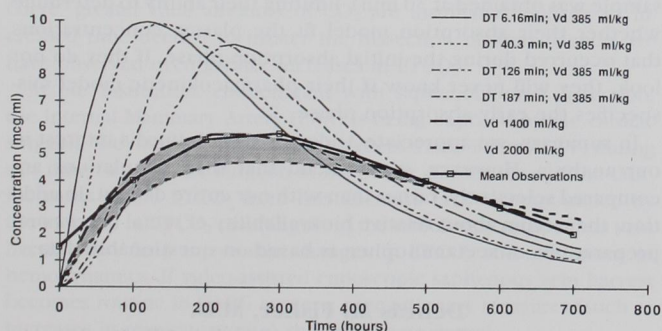

**Fig. 1.** Time-concentration profiles after administration of 20 mg/kg rectal acetaminophen. Parameters<sup>1</sup> used were CL/F,  $5.46 \text{ ml} \cdot \text{kg}^{-1} \cdot \text{min}^{-1}$ ;  $K_a$ ,  $0.00468 \text{ min}^{-1}$ ; Vd/F and zero order dissolution times (DT) as shown. The simulations using Vd/F of 1,400 or 2,000 ml/kg assumed rapid dissolution.
